# Supplementary material
Source: PubMed Central journal article supplement (PMC2366873)

## Supplemental Figure Legends

**Supplemental Figure S1.** Effect of H89 on the distribution of COPI and COPII. COS-7 cells were incubated with H89 at the indicated concentrations for 15 min, and double stained for Bap31 and Sec31A (left three columns) or  $\beta$ -COP (right three columns). Scale bar, 10  $\mu$ m

**Supplemental Figure S2.** Bap31, unlike conventional cargos, does not accumulate at ER exit sites in Noc-treated cells. COS-7 cells were incubated with dimethyl sulfoxide or 5  $\mu$ g/ml Noc for 3 h and then plus 50  $\mu$ M H89 for 15 min. They were double stained for Bap31 and SERCA2 (top two rows), Sec31A (third row), or  $\beta$ -COP (fourth row), or GM130 and Sec31p (bottom row). The boxed areas are enlarged in the insets. Scale bars, 5  $\mu$ m.

**Supplemental Figure S3.** Time courses of GM130 assembly and Bap31 cycling after BFA washout. COS-7 cells were incubated with 10  $\mu$ M BFA for 30 min, and then washed to remove BFA. Change in the localization of GM130 (left column) and Bap31 (middle column). Scale bar, 10  $\mu$ m

**Supplemental Figure S4.** Live cell imaging of the movement of Bap31-mRFP and NAGFP during recovery from BFA treatment. Tet-on HeLa cells expressing both Bap31-mRFP and

NAGFP were monitored after BFA washout. Arrows indicate the movement of an NAGFP positive dot. Arrowheads denote the accumulation of Bap31 at the juxtannuclear region. Scale bars, 10  $\mu\text{m}$ .

**Supplemental Figure S5.** Stably expressed Bap31-mRFP behaves similarly to endogenous Bap31. (A) Change in the localization of endogenous Bap31 and Bap31-mRFP during recovery from BFA treatment. Parental Tet-on HeLa cells (left column) and those stably expressing Bap31-mRFP (right column). Scale bar, 10  $\mu\text{m}$ . (B) Quantitation of cells with the juxtannuclear accumulation of Bap31-mRFP and endogenous Bap31.

**Supplemental Figure S6.** Behaviors of ERGIC-53 and Bap31 after BFA washout. HeLa cells were incubated with 10  $\mu\text{M}$  BFA for 30 min, and then washed to remove BFA. At the indicated times, the cells were double stained for ERGIC-53 (left column) and Bap31 (middle column). Scale bars, 10  $\mu\text{m}$

**Supplemental Figure 7.** Localization of chimeras between Bap31 and Bap29. At 3 h after transfection of the plasmids for the indicated chimeras, Tet-on HeLa cells were incubated with the 1  $\mu\text{g/ml}$  doxycycline for 40 h to induce protein expression. The cells were analyzed immediately

(Untreated) or subjected to BFA/washout treatment. Scale bar, 10  $\mu\text{m}$ .

**Supplemental Figure S8.** Distribution of 29(65)31-mRFP at 15°C. Tet-on HeLa cells expressing 29(65)31-mRFP were incubated at 15°C for 2 h, and then stained ERGIC-53. Scale bar, 10  $\mu\text{m}$

**Figure S1.**

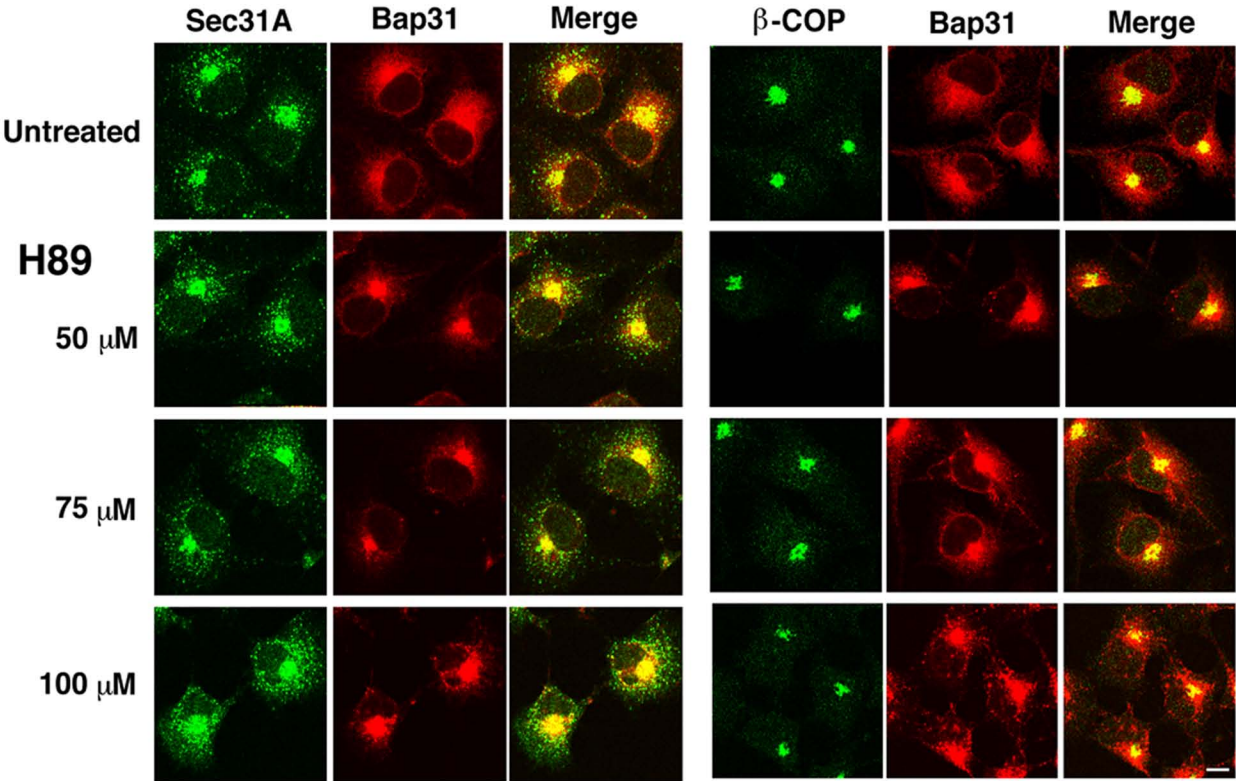

**Figure S2.**

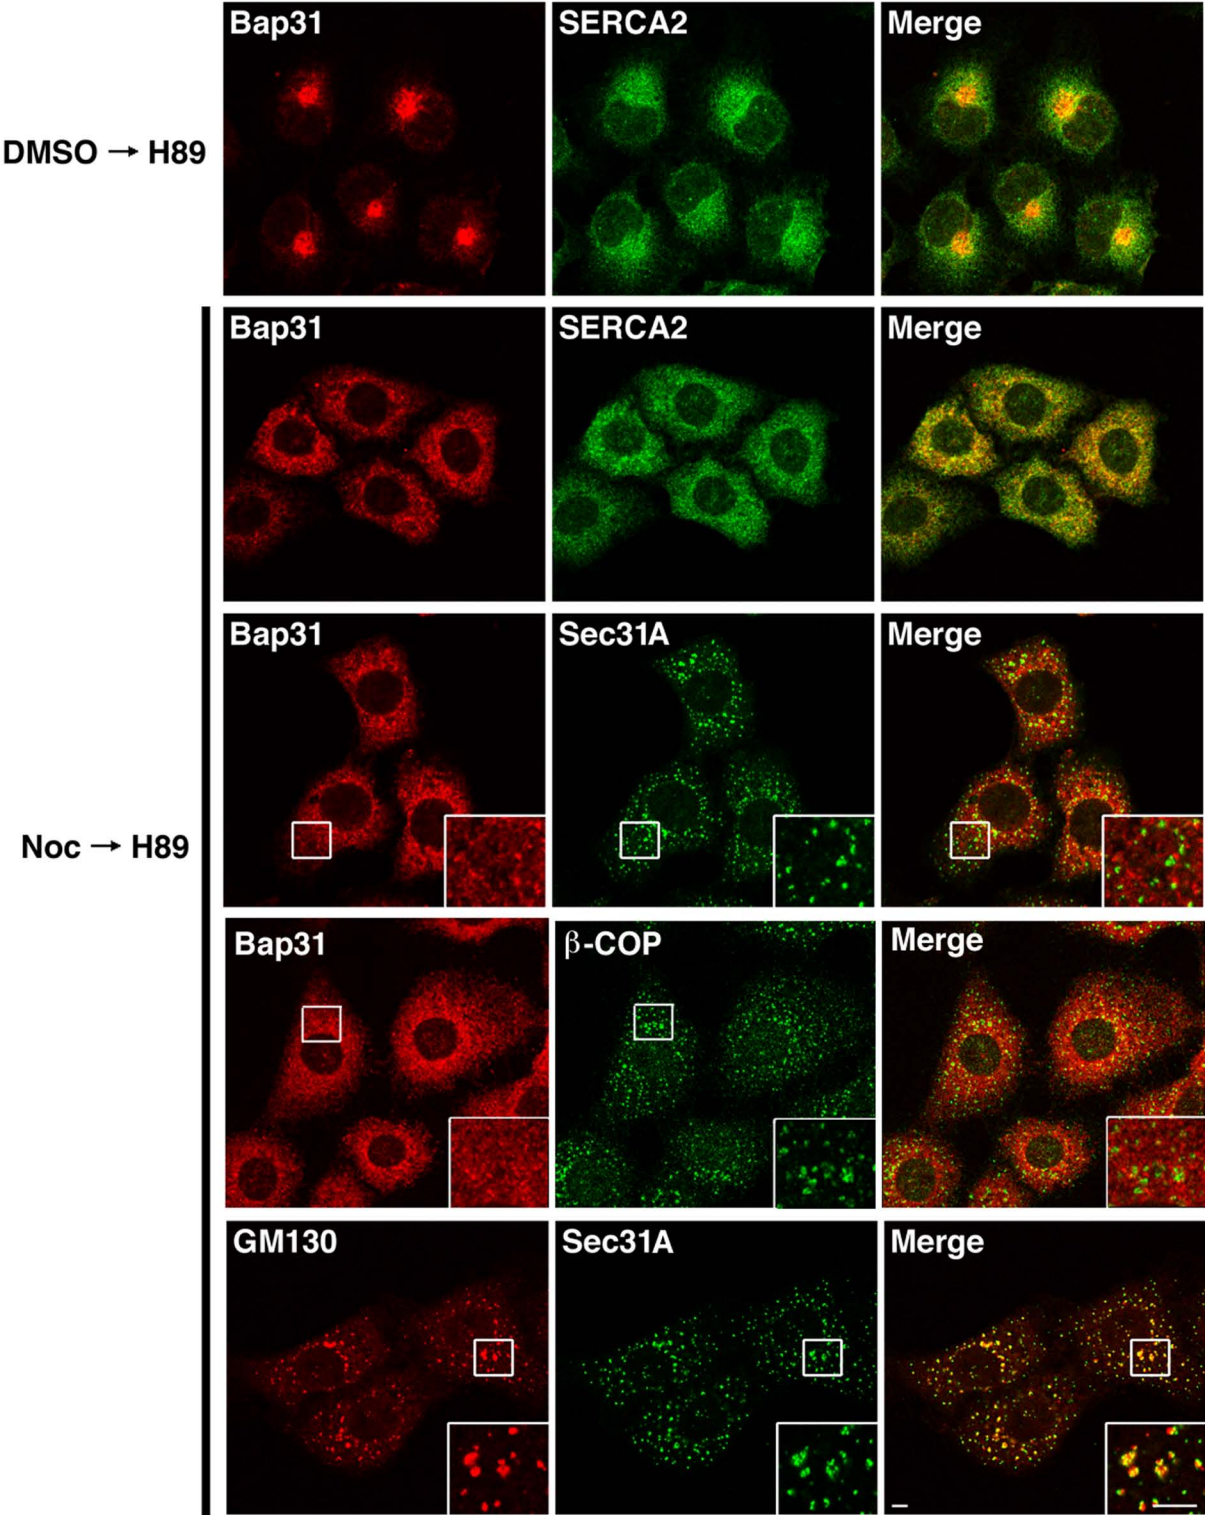

**Figure S3.**

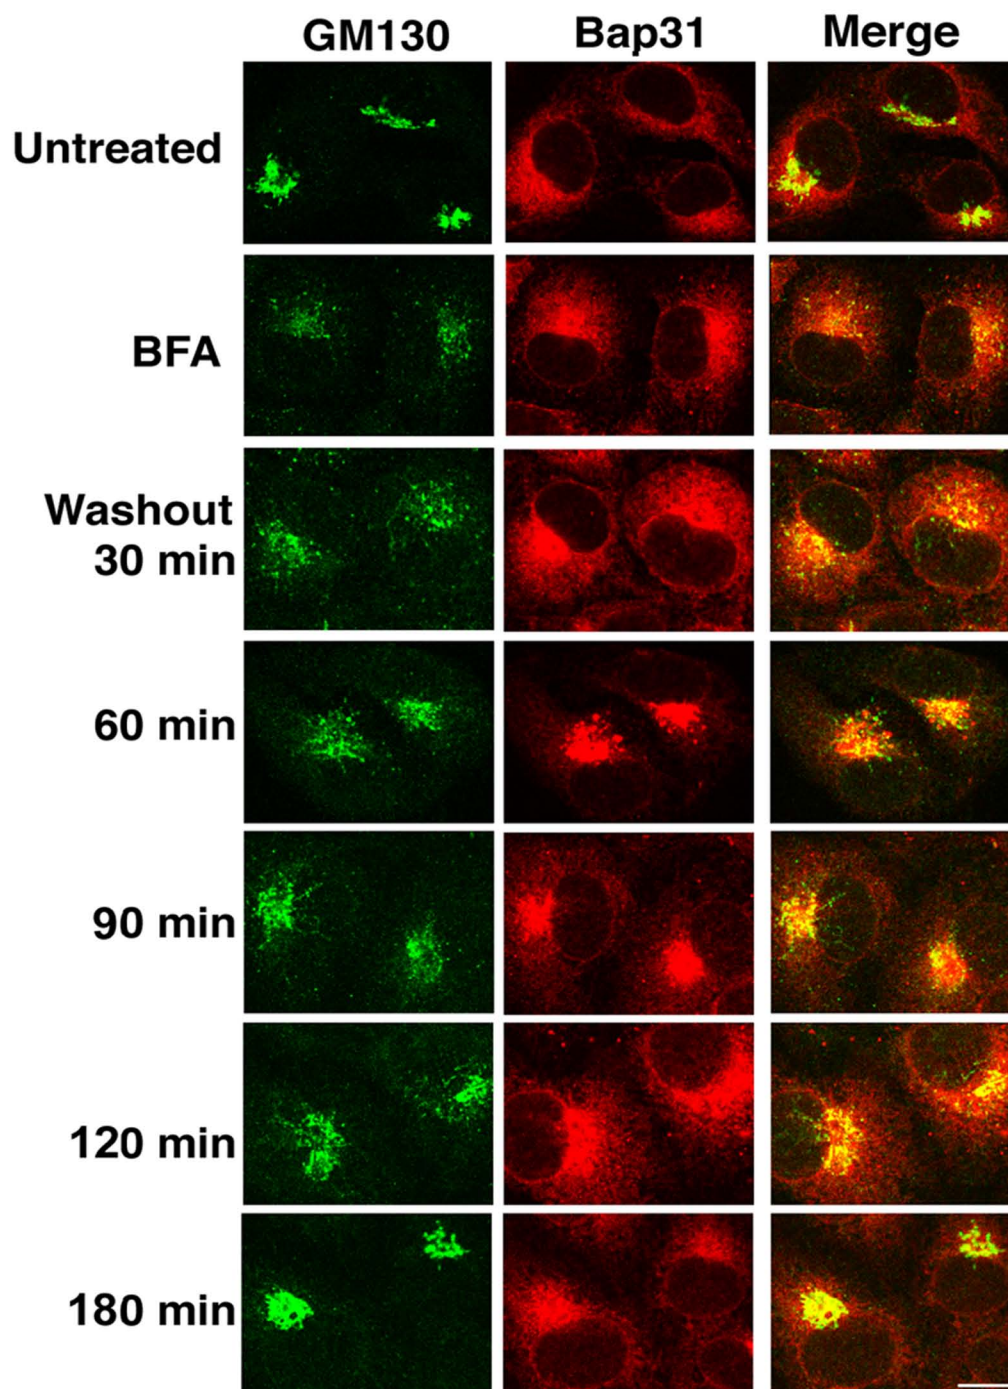

Figure S4.

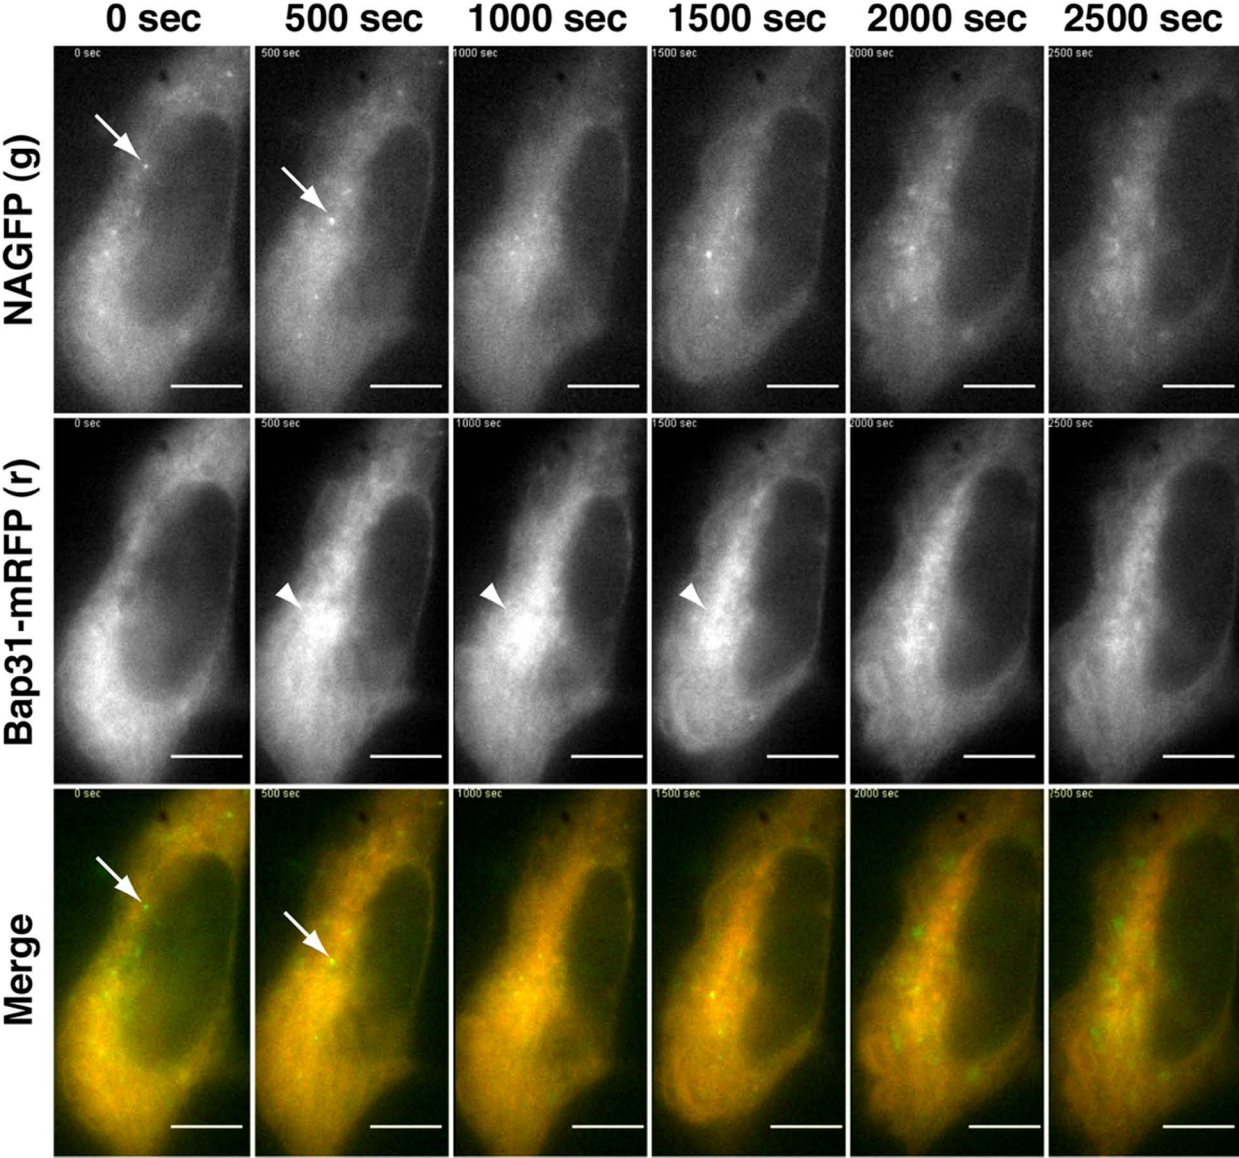

Figure S5.

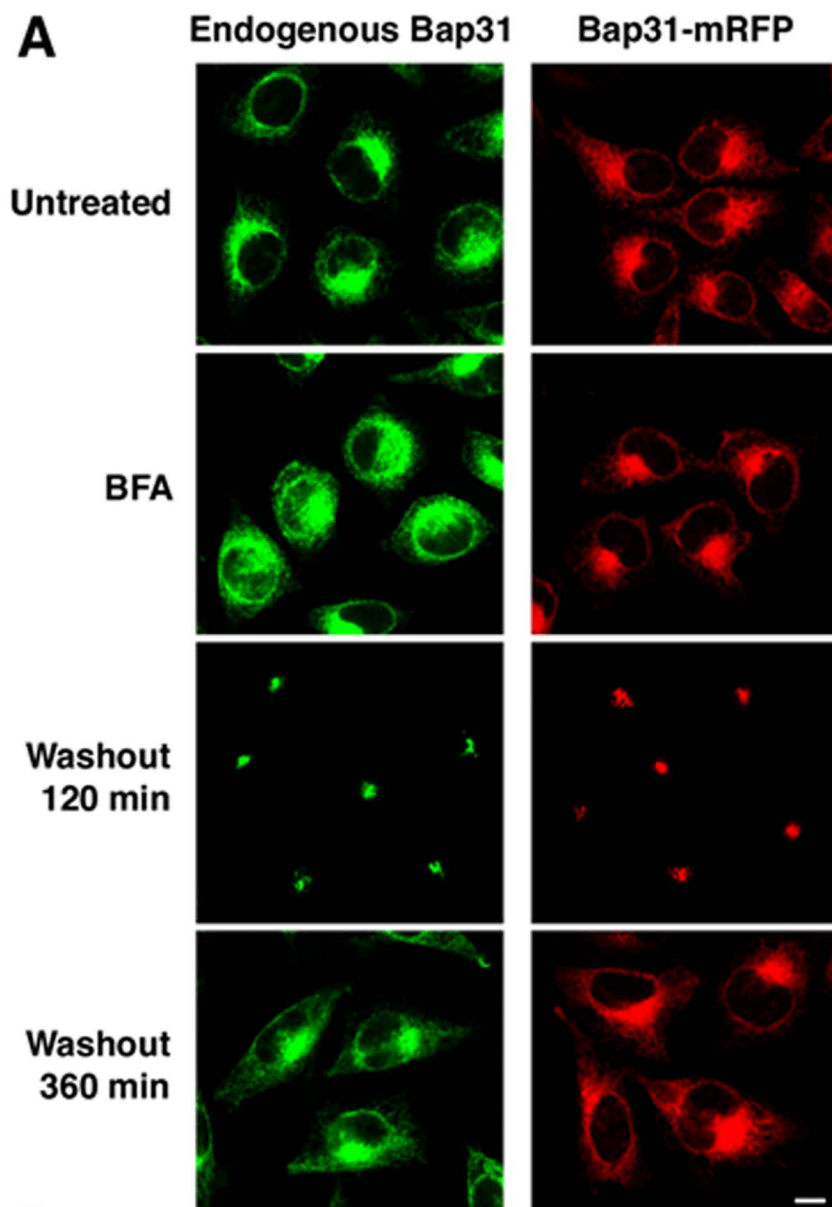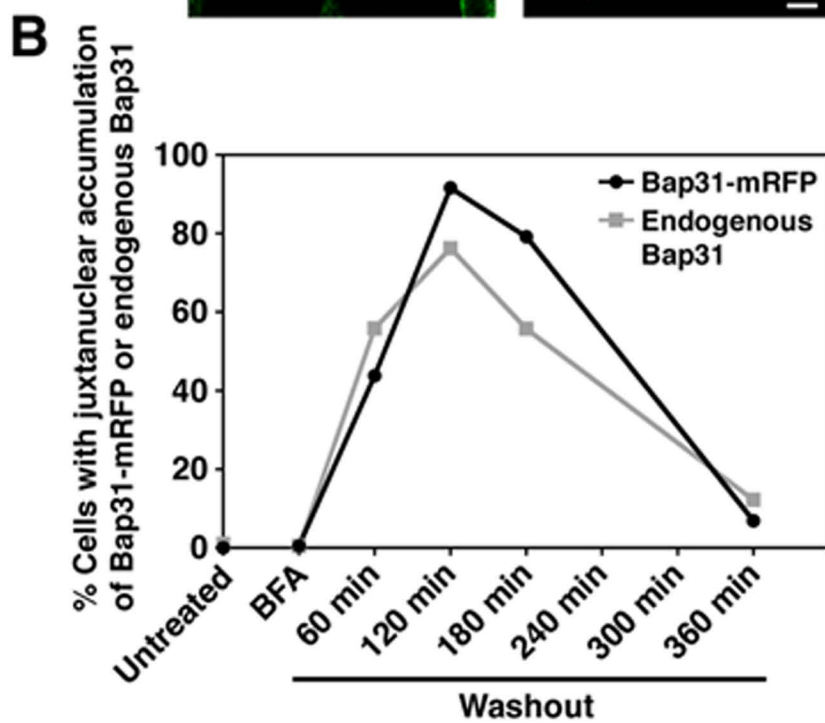



**Figure S6.**

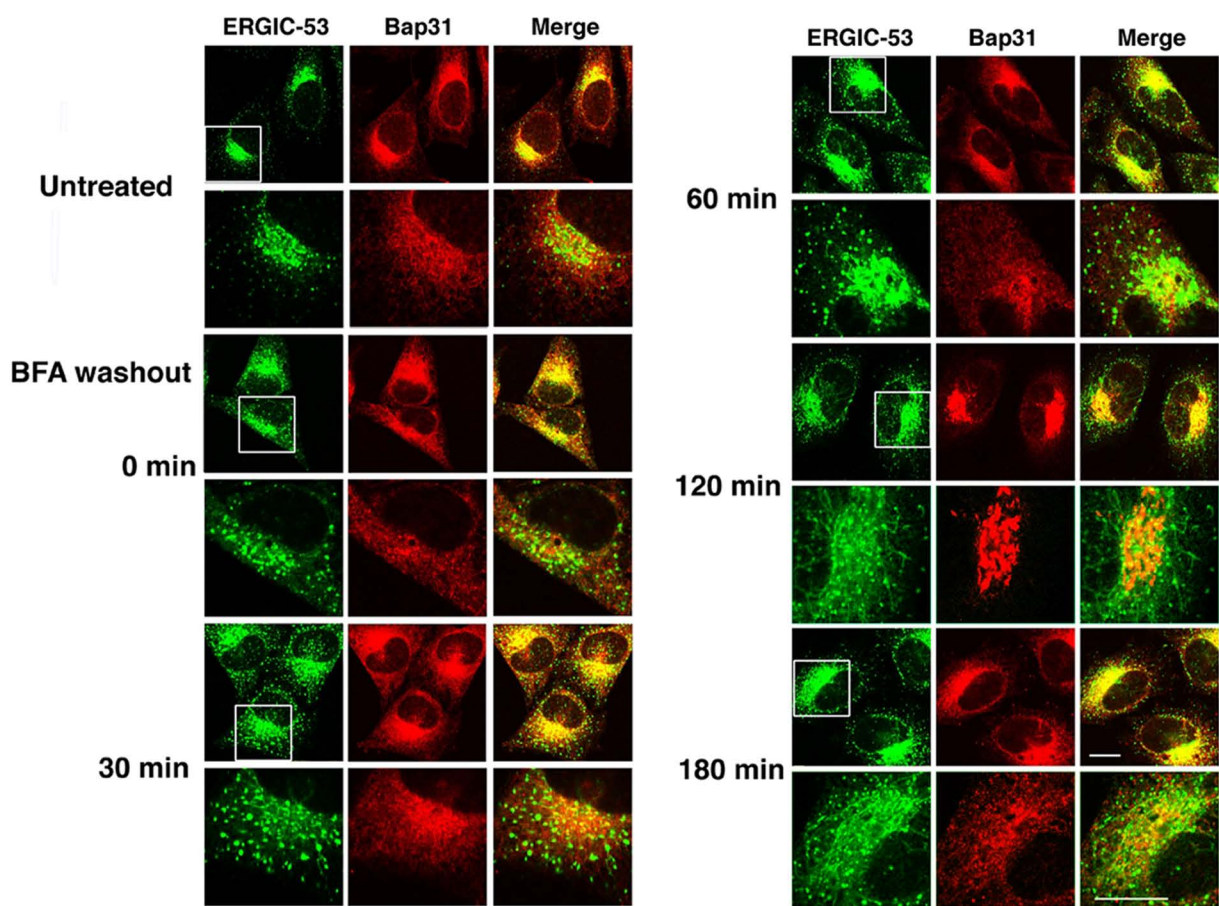

**Figure S7.**

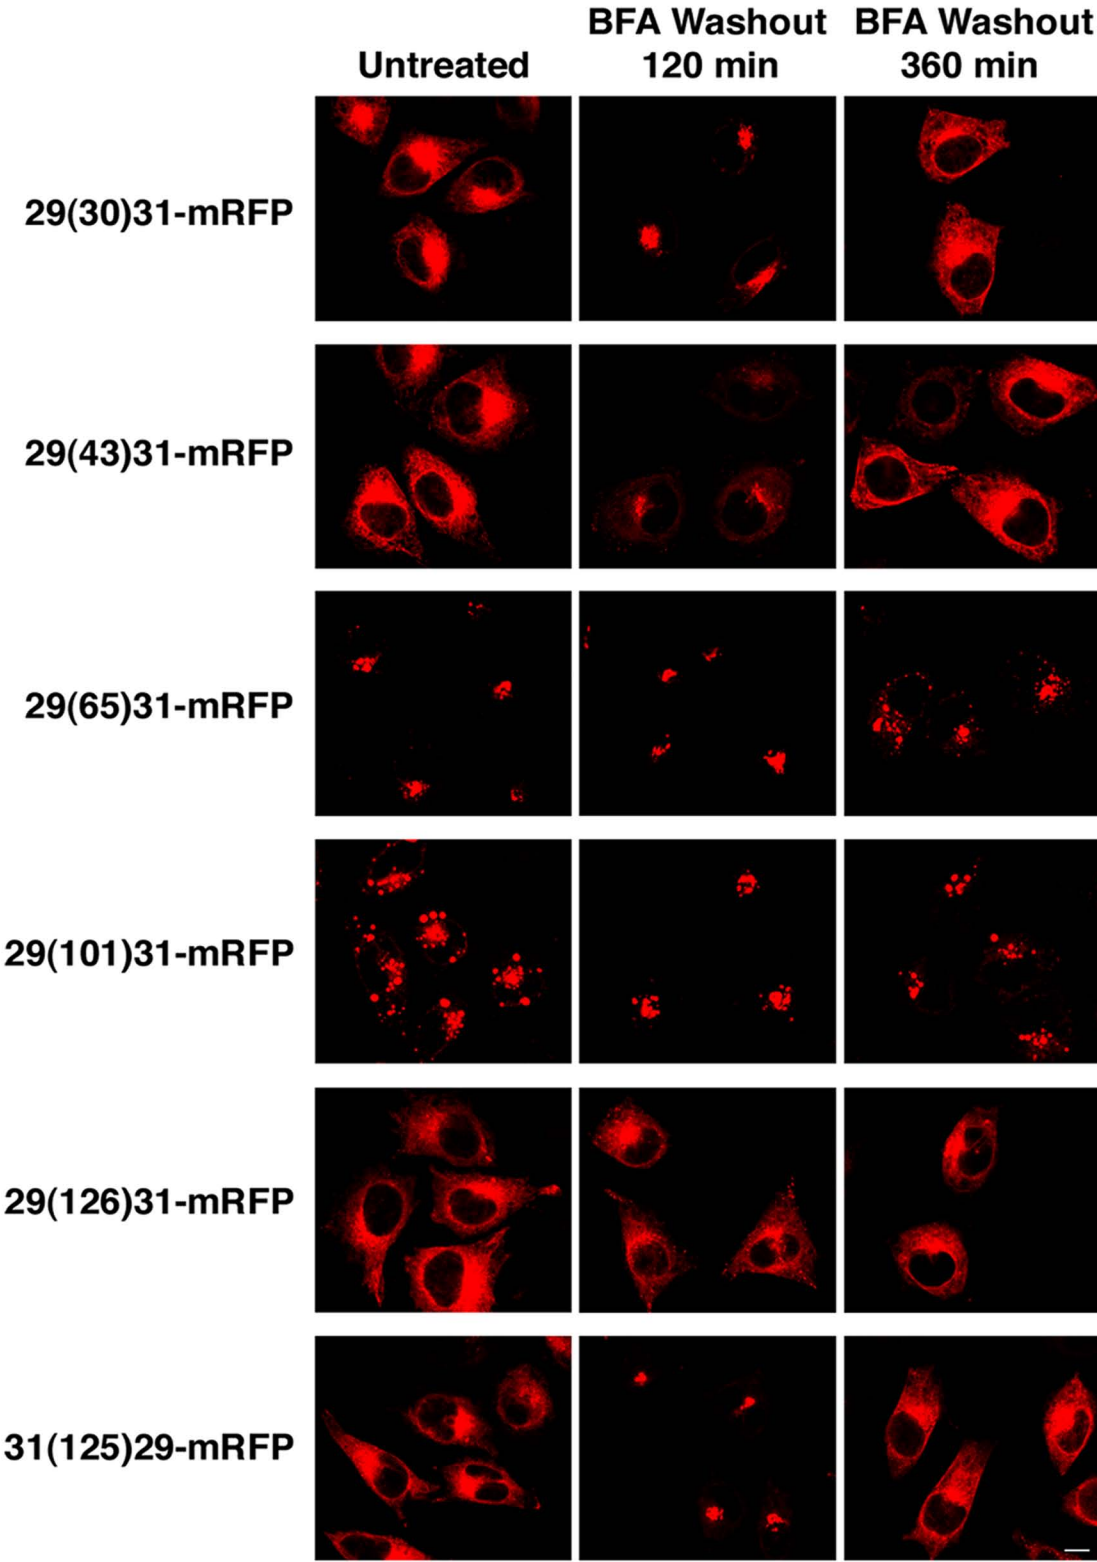

**Figure S8.**

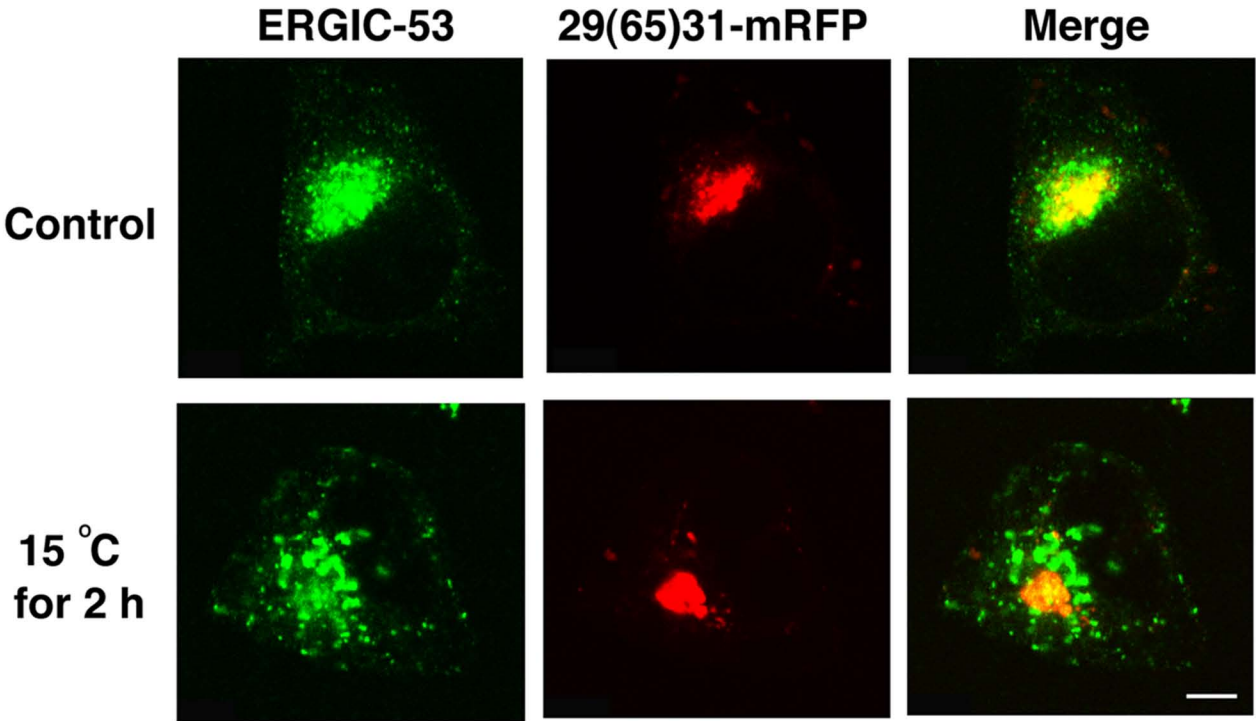

Supplement: mbc_E07-08-0781_1.pdf [file mbc_E07-08-0781_1.pdf]
